# Supplementary material for: Elastic Modulus of ECM Hydrogels Derived from Decellularized Tissue Affects Capillary Network Formation in Endothelial Cells
Source: PubMed Central journal article supplement (PMC7503911; doi:10.3390/ijms21176304), 2020-08-31
Supplement: ijms-21-06304-s001.pdf [file ijms-21-06304-s001.pdf]

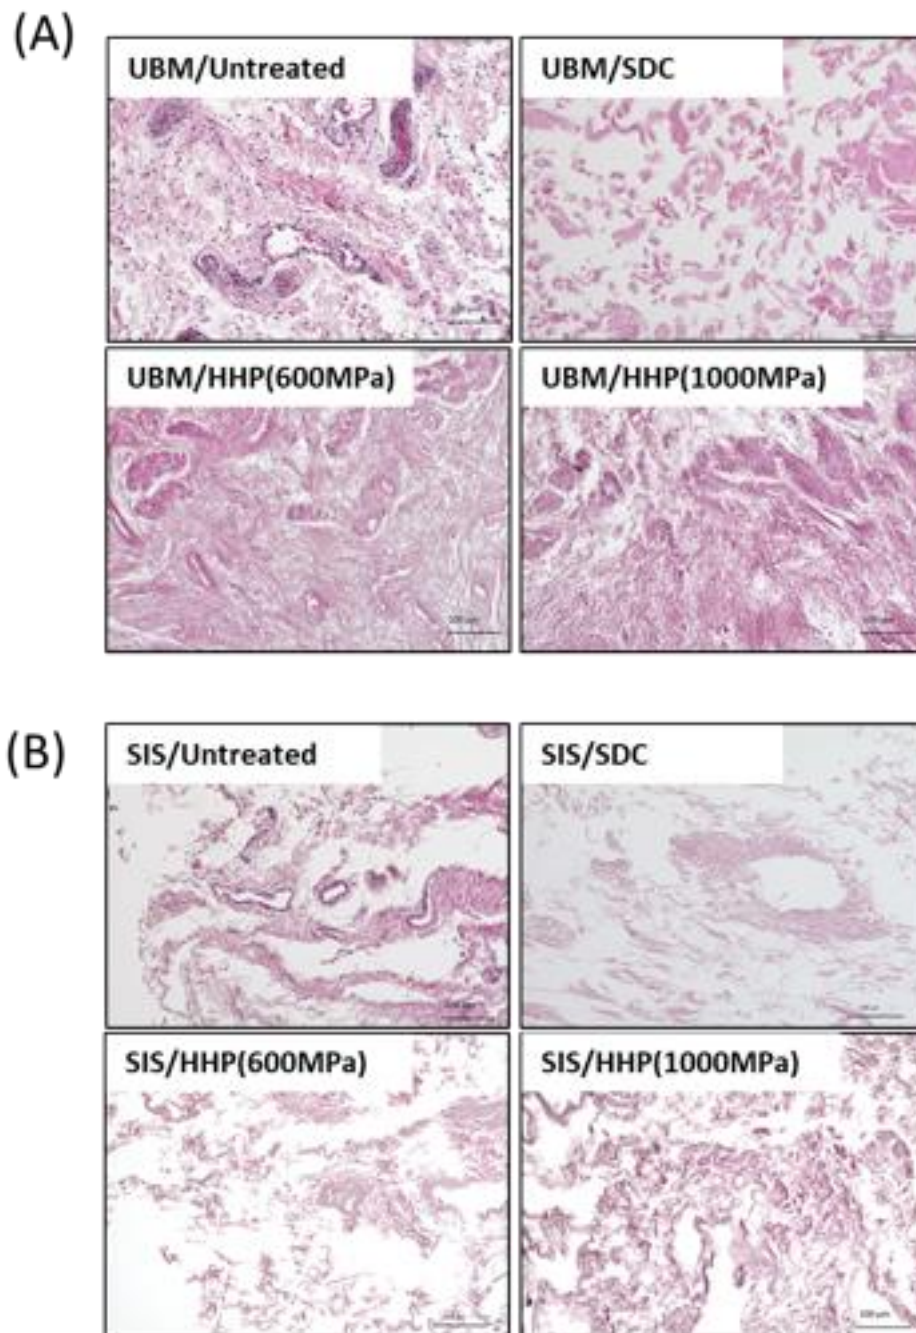

**Supplementary Fig 1.** Photographs of H-E staining of decellularized (A) UBM and (B) SIS with various decellularized methods.
